# Supplementary material for: Changes in Phytochemical Profiles and Biological Activity of Olive Leaves Treated by Two Drying Methods
Source: Front Nutr. 2022 Apr 28;9:854680. doi: 10.3389/fnut.2022.854680 (PMC9097227; doi:10.3389/fnut.2022.854680)
Supplement: Supplementary file 1 [file Data_Sheet_1.doc]

# Changes in phytochemical profiles and biological activity of olive leaves treated by two drying methods

Chengcheng Zhang1, Jianming Zhang1, Xiaoting Xin1, Shenlong Zhu2, Erli Niu2, Qinghang Wu1, Ting Li1, Daqun Liu1,*

1 Food Science Institute, Zhejiang Academy of Agricultural Sciences, Hangzhou 310021, China

2 Institute of Crop and Nuclear Technology Utilization, Zhejiang Academy of Agricultural Sciences, Hangzhou 310021, China

*Corresponding author:

Daqun Liu, E-mail: [liudaqun@zaas.ac.cn](mailto:liudaqun@zaas.ac.cn)

Table S1. Calibration curves used for HPLC quantification.

| Compounds | Rt (min) | Calibration curves | R2 | Linear range  (μg/mL) |
| --- | --- | --- | --- | --- |
| [Hydroxytyrosol](https://www.chemsrc.com/en/cas/10597-60-1_522847.html) | 5.337 | Y = -11733+9341.9*X | 0.9999 | 13.75-275 |
| Chlorogenic acid | 7.070 | Y =-3292+6252.1*X | 0.9998 | 4.6-91.7 |
| Secoxyloganin | 8.430 | Y =1395+4572.1*X | 1.0000 | 23.1-461.5 |
| Plantamajoside | 9.550 | Y =-1654+2404.5*X | 0.9995 | 13.8-276.9 |
| Rutin | 11.671 | Y =-432+6939.3*X | 0.9994 | 4.8-96.7 |
| Luteolin-7-O-glucoside | 12.597 | Y =3006+7658.7*X | 0.9994 | 5.1-102.8 |
| Apigenin-7-O-neohesperidoside | 13.803 | Y =3426+5625.8*X | 0.9983 | 6.7-133.4 |
| Taxifolin | 14.055 | Y = -1568+16950.9*X | 0.9998 | 18.5-369.2 |
| Quercetin | 14.35 | Y = -11817+12587.5*X | 0.9999 | 8.8-175.6 |
| Oleuropein | 16.419 | Y =1459+5382.6*X | 0.9998 | 25.6-513.3 |
| Eriodictyol | 20.234 | Y = -1236+6175.2*X | 1.0000 | 28.8-576.8 |
| Luteolin | 21.134 | Y = -5079+19174.8*X | 0.9995 | 2.2-43.3 |
| Kaempferol | 24.857 | Y = -13367+18813.5*X | 1.0000 | 5.8-116.6 |
| Apigenin | 26.870 | Y = -12297+17367.4*X | 0.9999 | 5.3-100.5 |
| Asiatic acid | 3.554 | Y =2560.5+ 4126.9*X | 0.9999 | 3.24-323 |
| Oleanonic acid | 4.725 | Y = -1451.8+4198.4*X | 0.9996 | 3.7-369 |
| Maslinic acid | 5.865 | Y = -4574.9+3976.8*X | 0.9999 | 3.24-323 |
| Corosolic acid | 6.187 | Y =779.67+4236.5*X | 1.0000 | 3.92-392 |
| Oleanolic acid | 9.927 | Y=1613.1+5762.8*X | 0.9999 | 2.3-230 |
| Ursolic acid | 10.232 | Y= 8616.1+4334.9*X | 1.0000 | 3.46-346 |

Rt, retention times; R2, correlation coefficients.

Table S2. Spearman’s correlation co-efficient analysis between chemical constituents and the bioactivities (DPPH; ABTS; FRAP; α-amylase, α-glucosidase, and ACE inhibition) of olive leaf extracts.

| Analytes | DPPH | FRAP | ABTS | α-amylase | α- Glucosidase | ACE |
| --- | --- | --- | --- | --- | --- | --- |
| Apigenin | 0.4595 | 0.4652 | 0.4966 | 0.7711 | 0.3283 | 0.4889 |
| Apigenin-7-O-glucoside | 0.0532 | -0.0290 | -0.0458 | -0.2618 | -0.3447 | -0.3879 |
| Apigenin-7-O-neohesperidoside | -0.2146 | -0.2167 | -0.0602 | -0.2118 | 0.0795 | -0.1876 |
| Asiatic acid | 0.0316 | 0.0303 | 0.0756 | 0.0371 | 0.0422 | -0.0566 |
| Chlorogenic acid | 0.5866 | 0.5430 | 0.5040 | 0.3509 | 0.3927 | 0.6157 |
| Corosolic acid | 0.2195 | 0.1953 | 0.1953 | 0.4644 | 0.2371 | 0.3040 |
| Coumarin | 0.3706 | 0.2805 | 0.2373 | -0.1910 | -0.0893 | 0.0754 |
| Diosmetin-7-O-neohesperidoside | 0.6036 | 0.4888 | 0.4859 | 0.2154 | 0.4533 | 0.4528 |
| Eriodictyol | 0.7745 | 0.6635 | 0.6602 | 0.5315 | 0.5109 | 0.6466 |
| Esculin | 0.5824 | 0.5333 | 0.4779 | 0.2203 | 0.0247 | 0.3326 |
| Hispidulin | 0.5137 | 0.4872 | 0.5850 | 0.8152 | 0.7477 | 0.6260 |
| Hydroxytyrosol | 0.8486 | 0.8051 | 0.7418 | 0.4556 | 0.4855 | 0.6237 |
| Hydroxytyrosol 4-O-glucoside | 0.2095 | 0.1738 | 0.1189 | -0.1741 | 0.2302 | 0.1968 |
| Kaempferol | 0.0994 | 0.0407 | 0.0789 | 0.3399 | 0.3758 | 0.1433 |
| Kaempferol-7-O-glucoside | 0.7323 | 0.6298 | 0.6033 | 0.3099 | 0.2515 | 0.5390 |
| Luteolin | 0.5142 | 0.5191 | 0.5631 | 0.7977 | 0.6301 | 0.5848 |
| Luteolin-3',7-di-O-glucoside | 0.5659 | 0.4562 | 0.4905 | 0.1426 | 0.3612 | 0.3981 |
| Luteolin-4'-O-glucoside | 0.6126 | 0.5181 | 0.4718 | 0.1580 | 0.3902 | 0.5202 |
| Luteolin-7-O-glucoside | 0.6205 | 0.5245 | 0.4594 | 0.1910 | 0.0762 | 0.3459 |
| Maslinic acid | 0.5513 | 0.5698 | 0.4548 | 0.0129 | 0.0981 | 0.2731 |
| Oleanolic acid | 0.6141 | 0.5871 | 0.6537 | 0.3091 | 0.6512 | 0.6170 |
| Oleanonic acid | 0.5498 | 0.5325 | 0.4473 | 0.1995 | 0.0880 | 0.2062 |
| Oleuropein | 0.3570 | 0.2692 | 0.1240 | -0.2940 | -0.2296 | -0.0299 |
| Plantamajoside | -0.2539 | -0.0880 | -0.0187 | 0.0923 | 0.0424 | 0.0456 |
| Quercetin | 0.7842 | 0.6742 | 0.6650 | 0.4355 | 0.4962 | 0.5647 |
| Quercetin-3-O-glucoside | 0.6586 | 0.6669 | 0.6329 | 0.4342 | 0.1526 | 0.4710 |
| Quercetin-4'-O-glucoside | 0.1674 | 0.1028 | 0.1689 | 0.3436 | 0.3222 | 0.1842 |
| Rutin | 0.4108 | 0.2808 | 0.2715 | 0.1125 | 0.3133 | 0.1689 |
| Secoxyloganin | 0.3137 | 0.2236 | 0.1148 | -0.3784 | -0.1470 | -0.0082 |
| Taxifolin | 0.4599 | 0.4960 | 0.5343 | 0.4216 | 0.5405 | 0.5184 |
| Taxifolin-3-glucoside | 0.4839 | 0.4169 | 0.4779 | 0.0847 | 0.4847 | 0.4880 |
| TFC | 0.9024 | 0.8069 | 0.7763 | 0.5575 | 0.5645 | 0.6883 |
| Tiliroside | 0.4128 | 0.2998 | 0.1377 | 0.2443 | 0.0427 | 0.0667 |
| TPC | 0.7706 | 0.6267 | 0.5534 | 0.5828 | 0.3400 | 0.4978 |
| Ursolic acid | 0.2630 | 0.2000 | 0.3021 | 0.4005 | 0.4680 | 0.3076 |


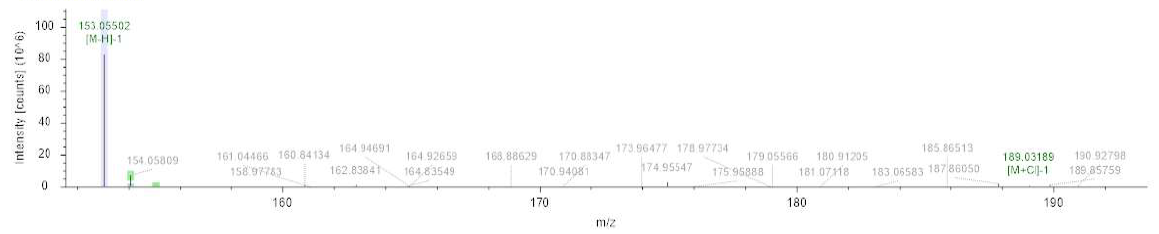

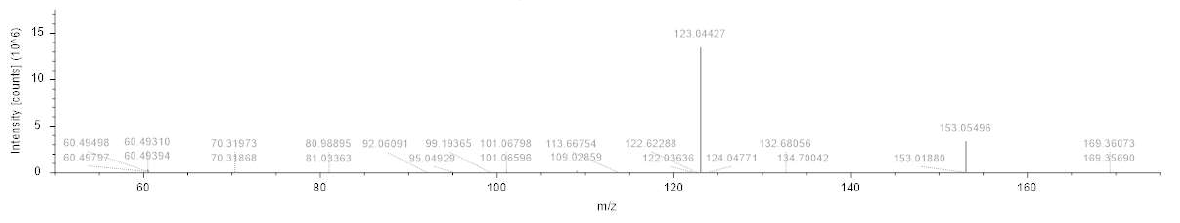


**1.** [**Hydroxytyrosol**](https://www.chemsrc.com/en/cas/10597-60-1_522847.html)


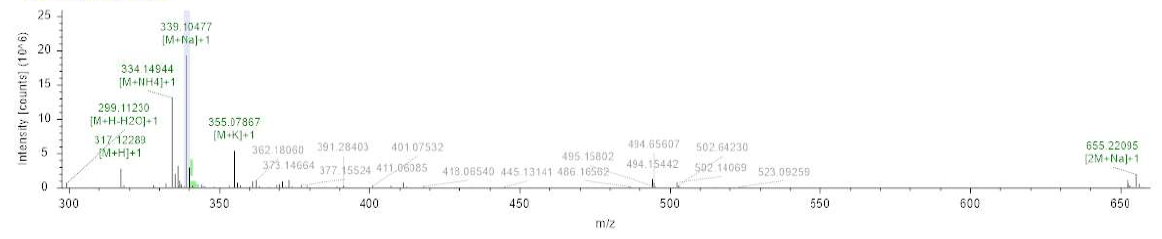


**2.** [**Hydroxytyrosol 4-O-glucoside**](https://www.chemsrc.com/en/cas/54695-80-6_327046.html)


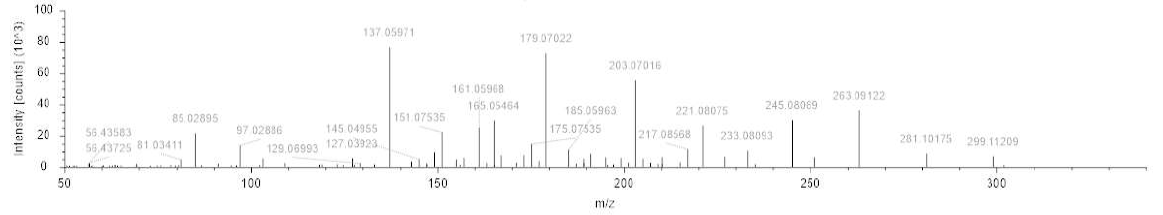


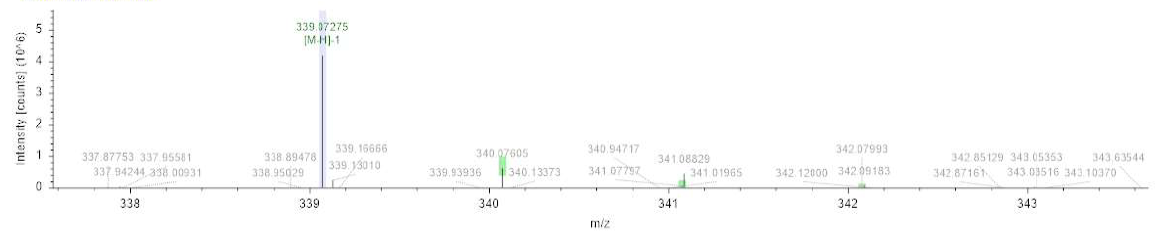


**3. Esculin**


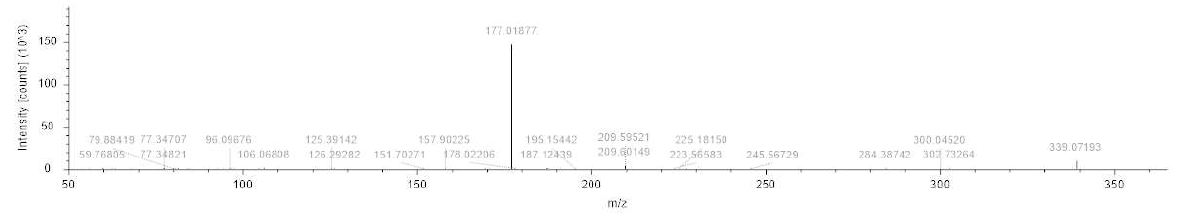


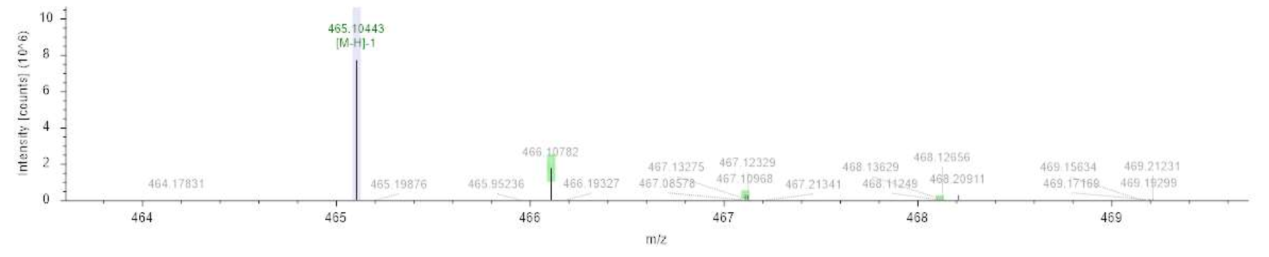

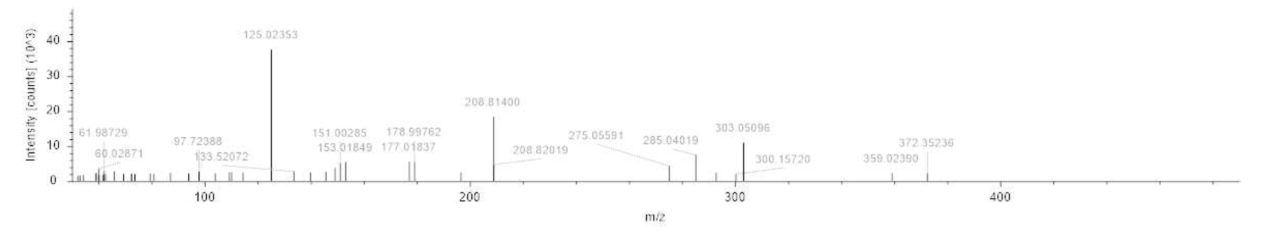


**4. Taxifolin-3-glucoside**


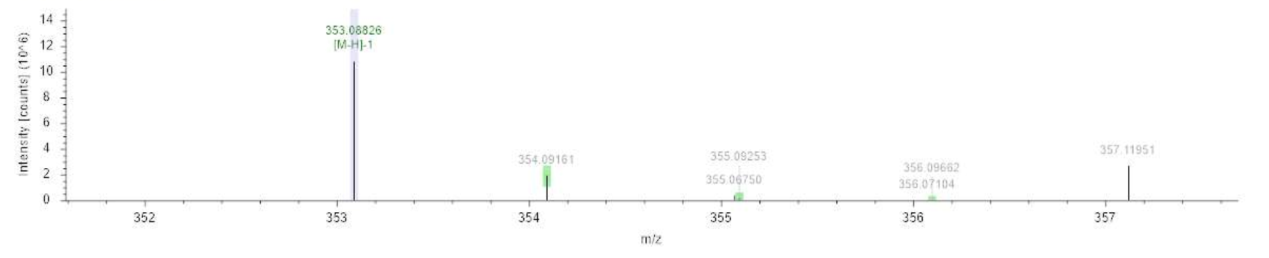

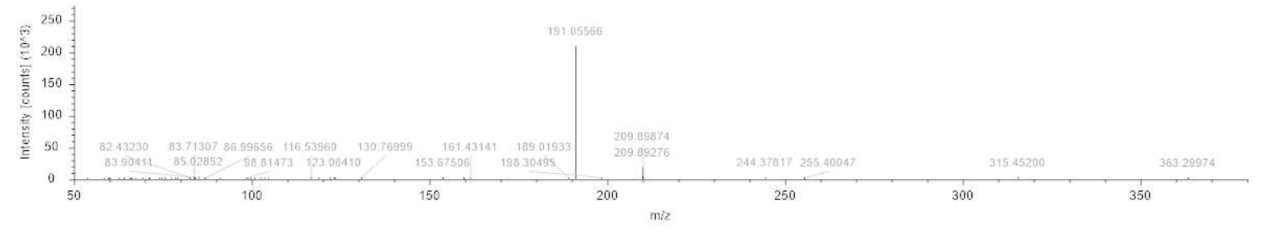


**5. Chlorogenic acid**


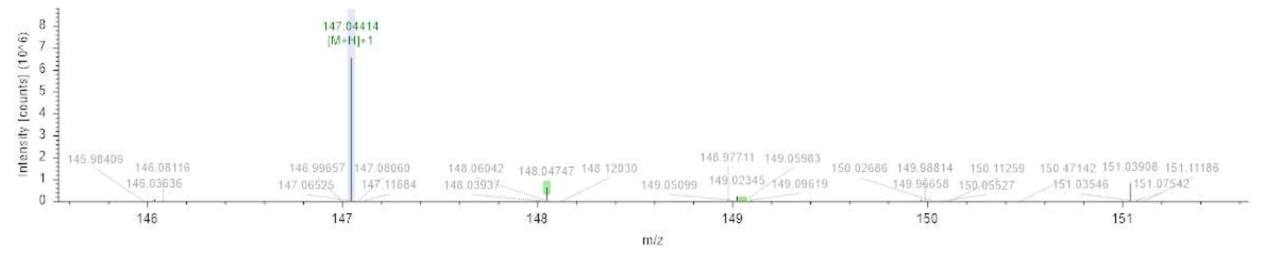


**6. Coumarin**


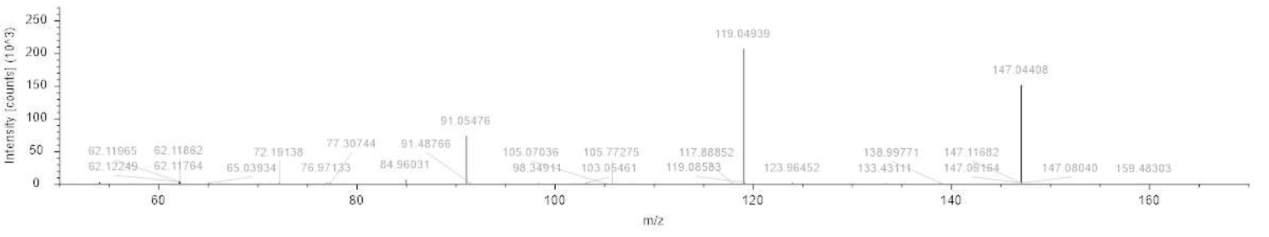


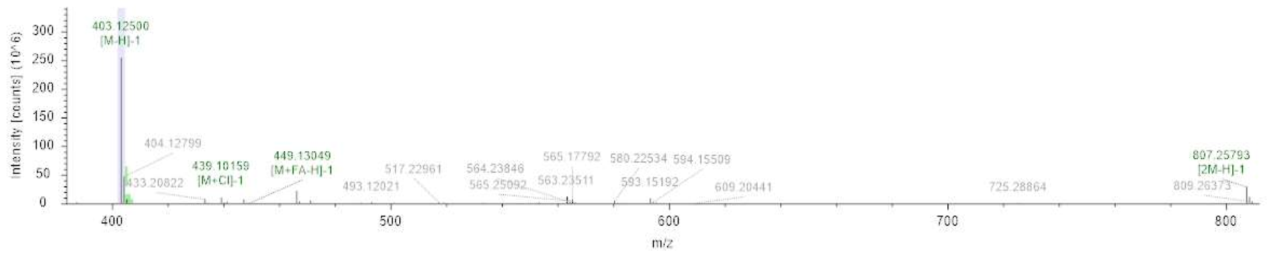


**7. Secoxyloganin**


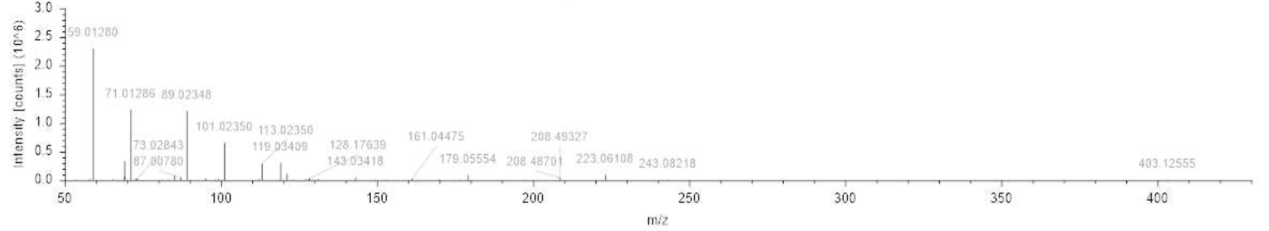


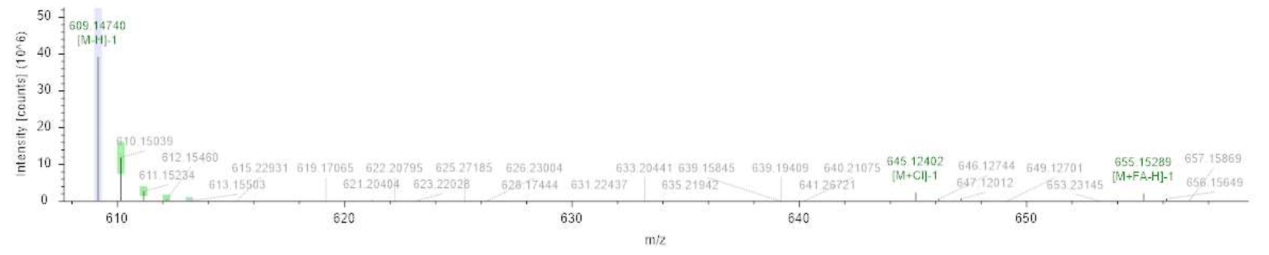


**8. Luteolin-3',7-di-O-glucoside**


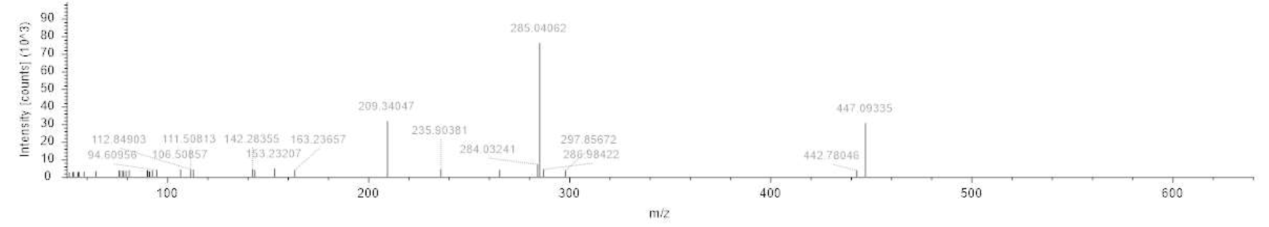


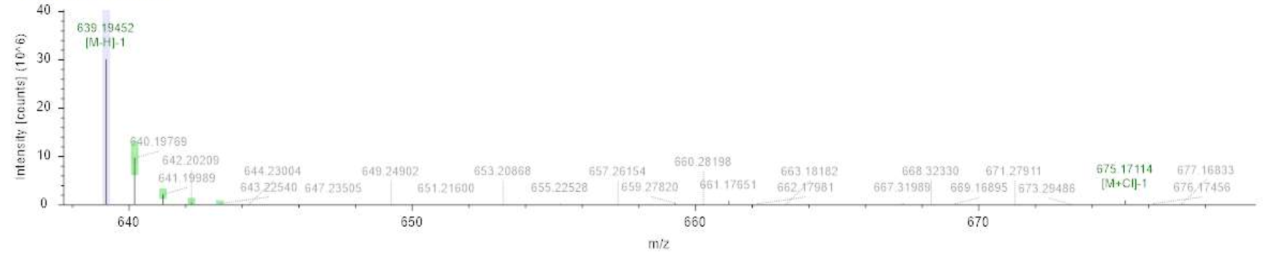


**9. Plantamajoside**


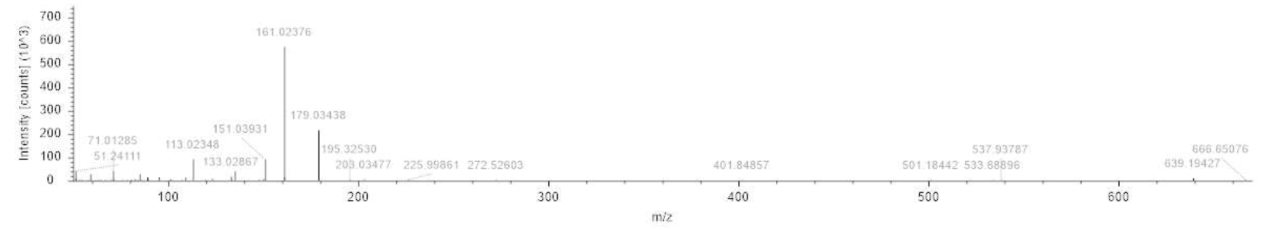


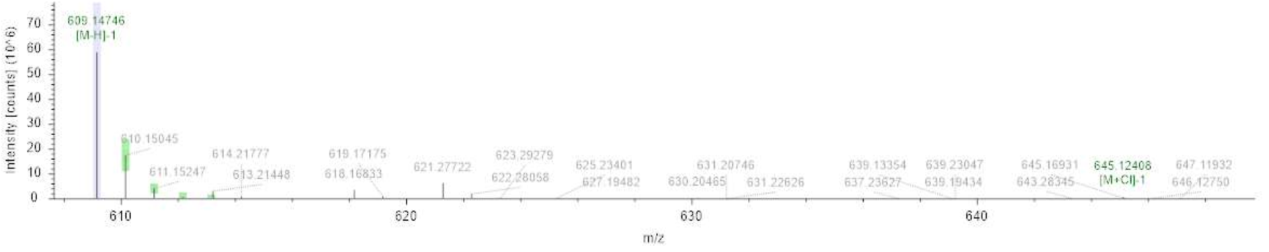


**10. Rutin**


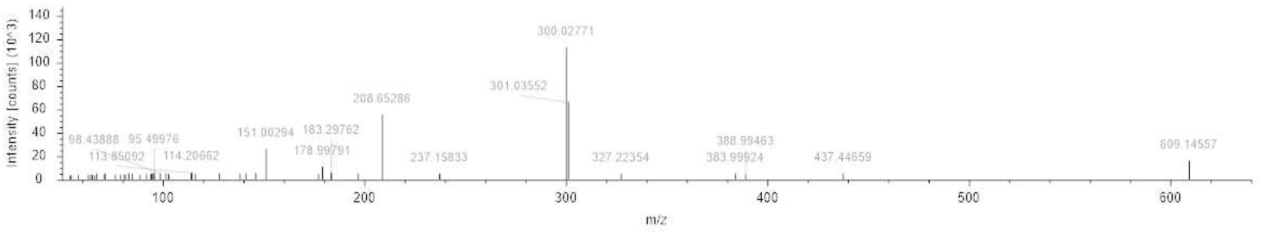


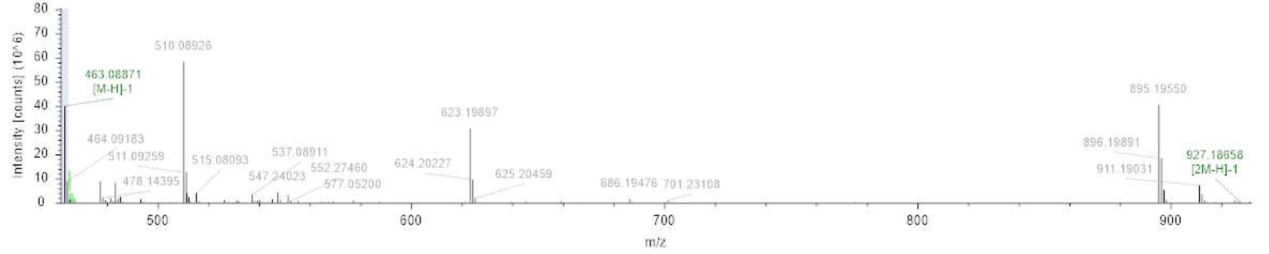


**11. Quercetin-3-O-glucoside**


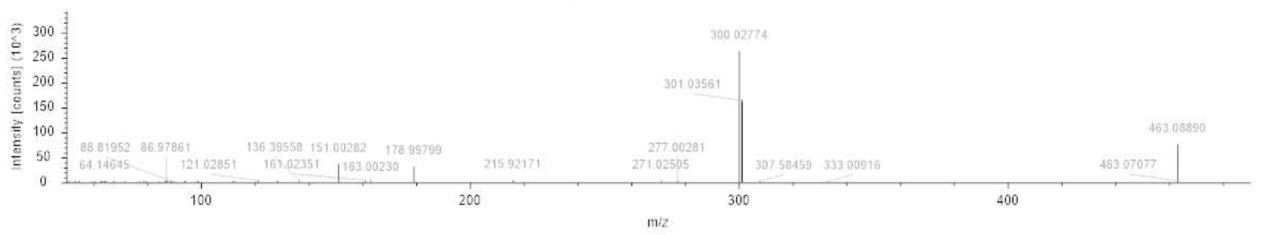


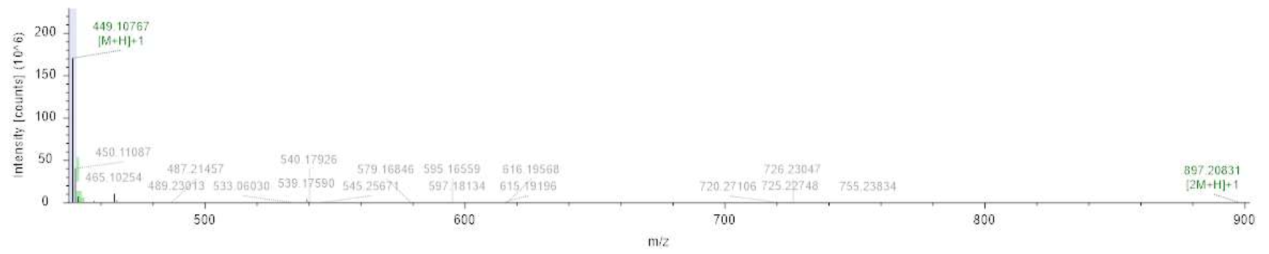

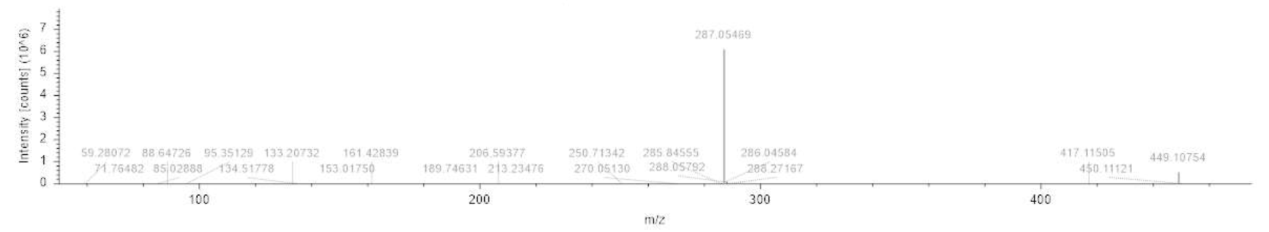


**12. Luteolin-7-O-glucoside**


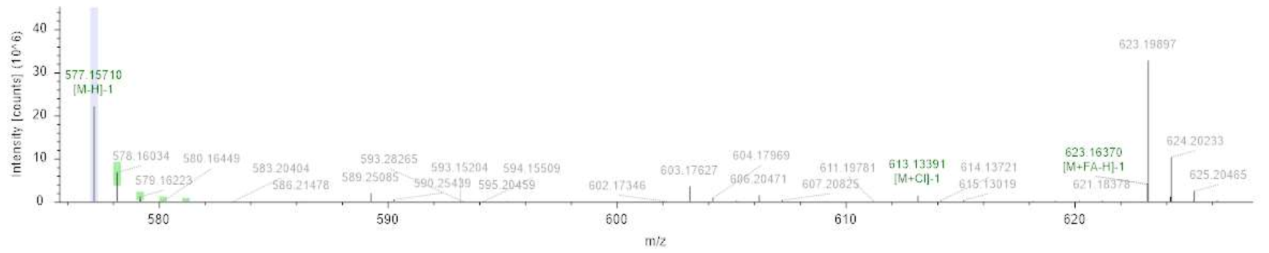


**13. Apigenin-7-O-neohesperidoside**


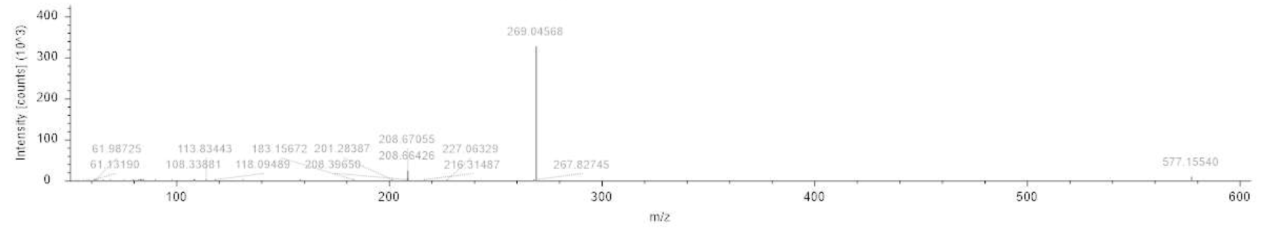


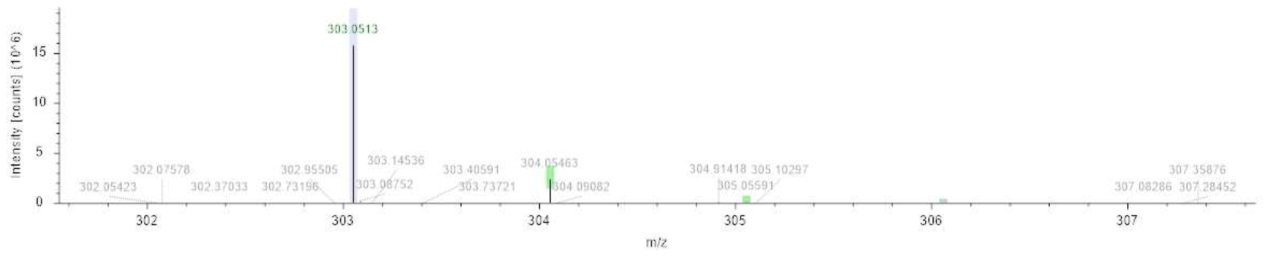


**14. Taxifolin**


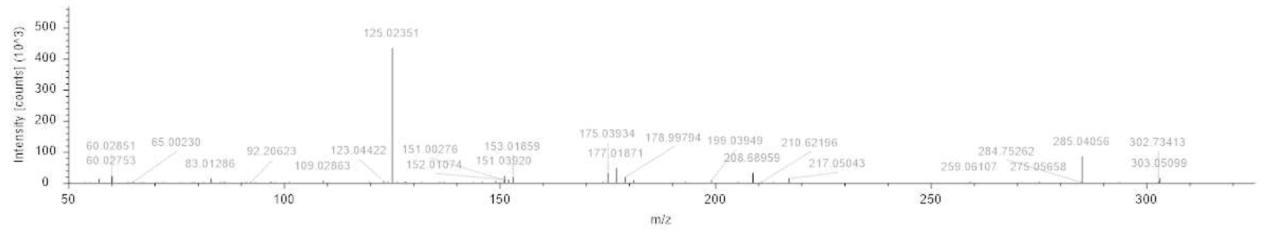


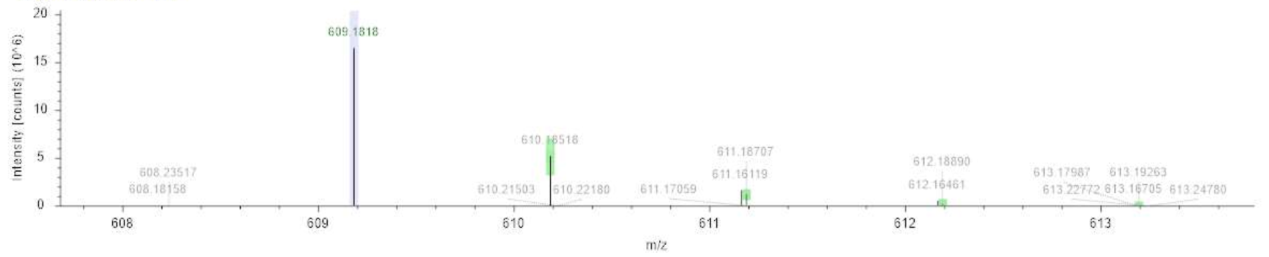


**15. Diosmetin-7-O-neohesperidoside**


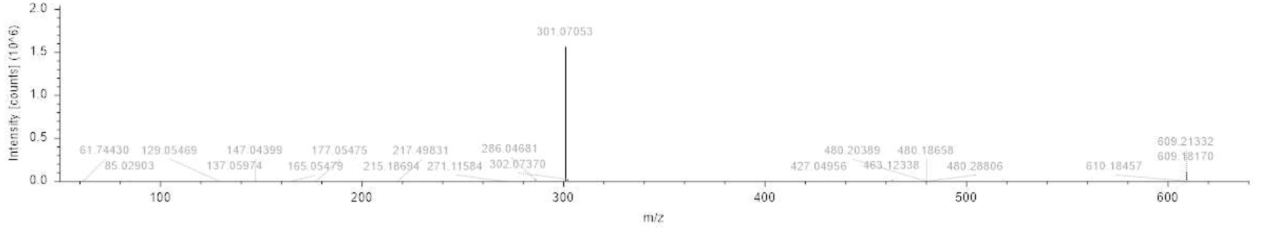


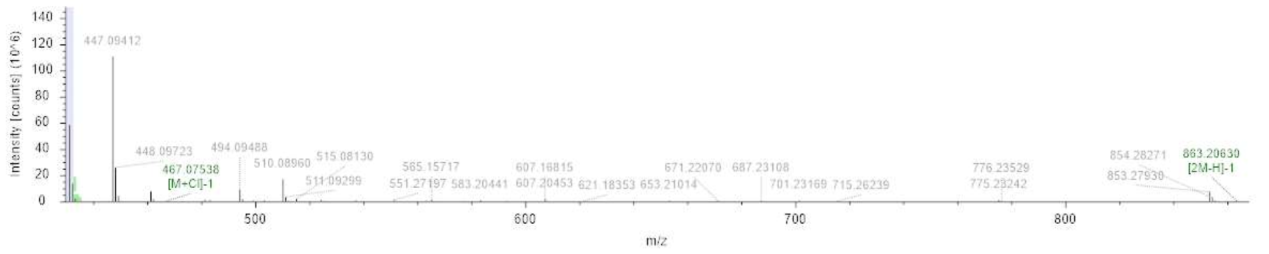


**16. Apigenin-7-O-glucoside**


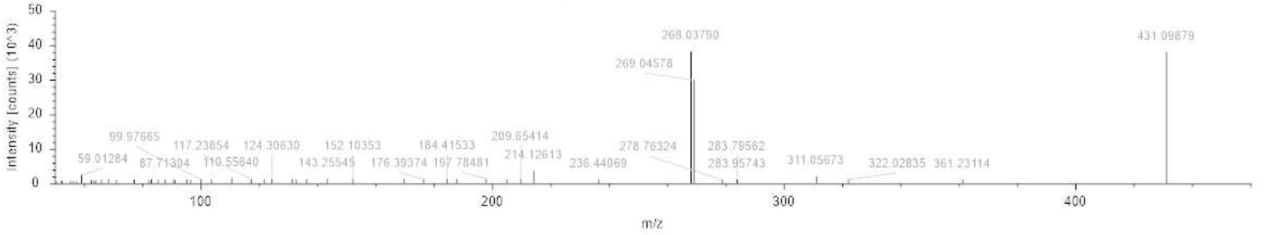


**17. Kaempferol-7-O-glucoside**


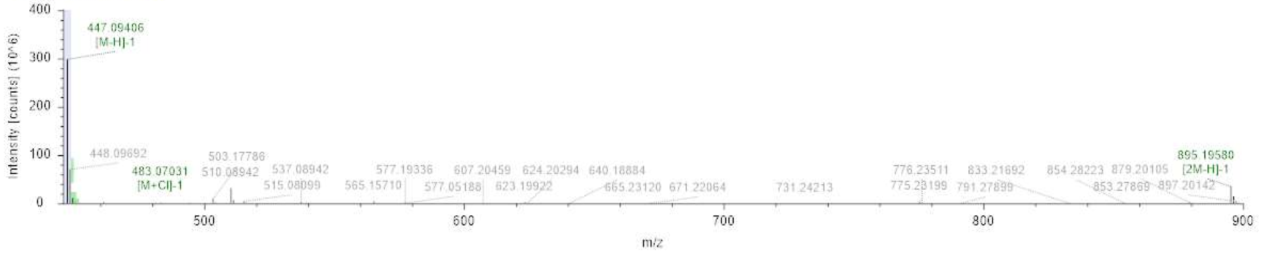


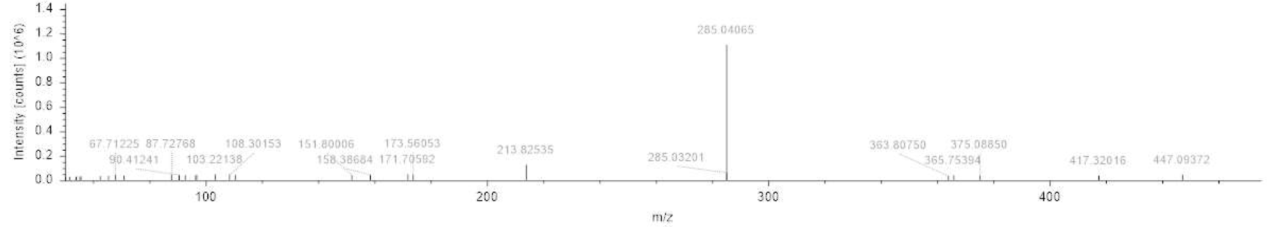


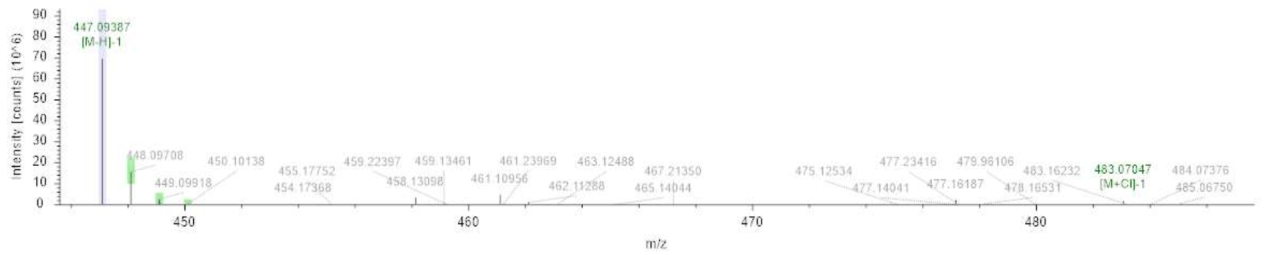


**18. Luteolin 4'-O-glucoside**


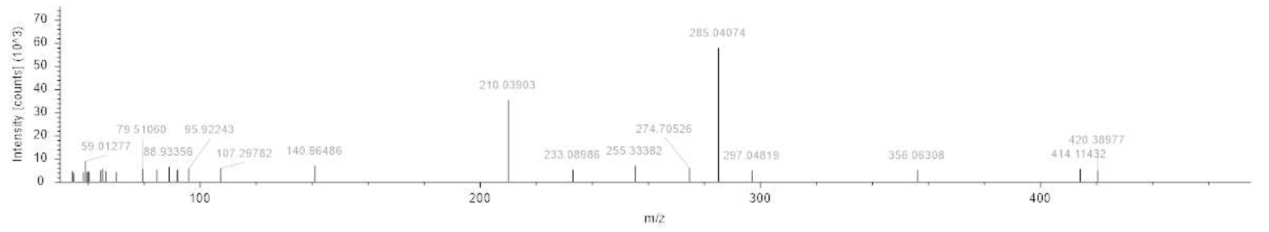


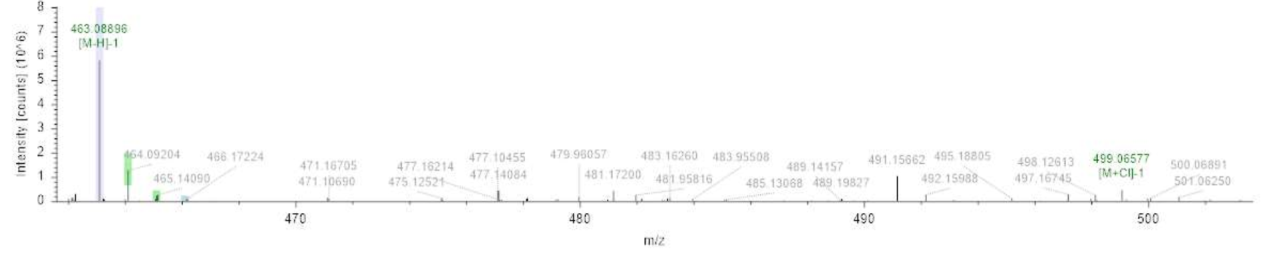


**19. Quercetin-4'-O-glucoside**


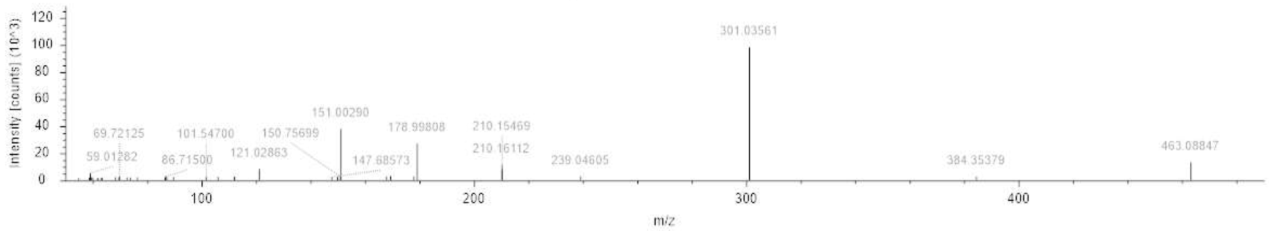


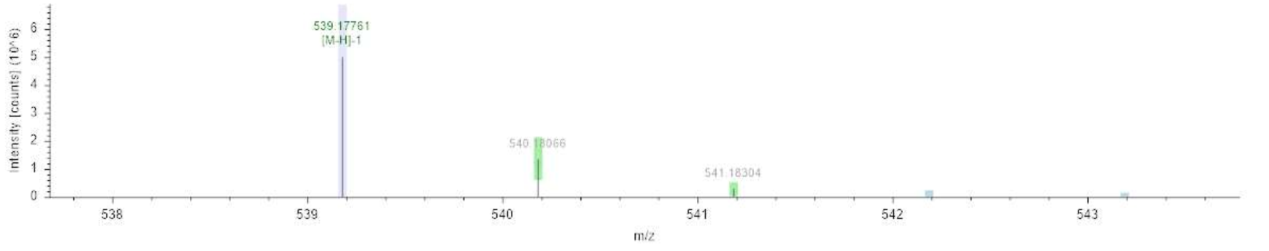


**20. Oleuropein**


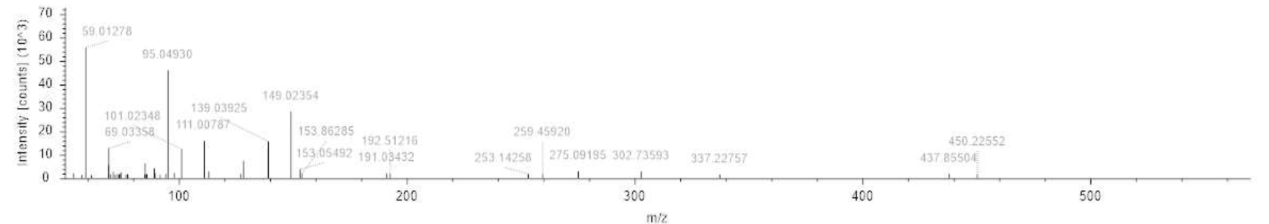


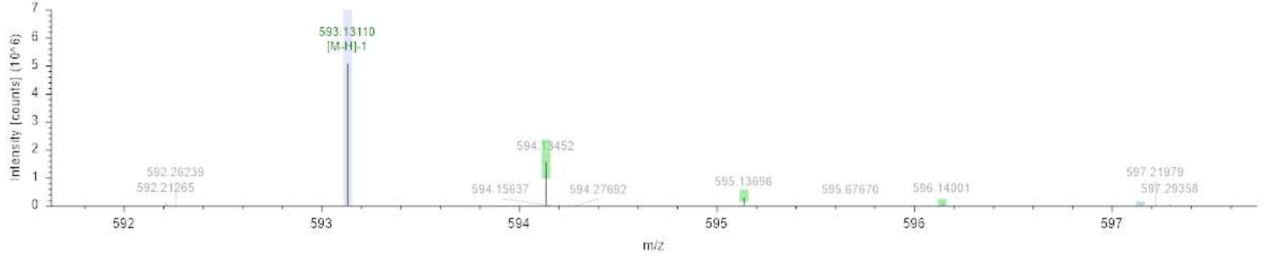


**21. Tiliroside**


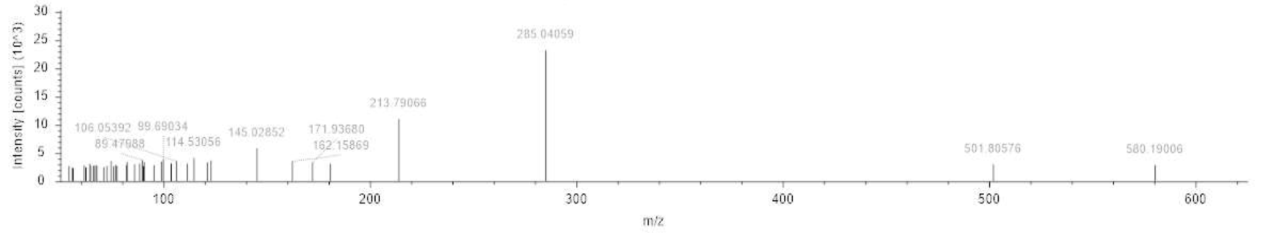


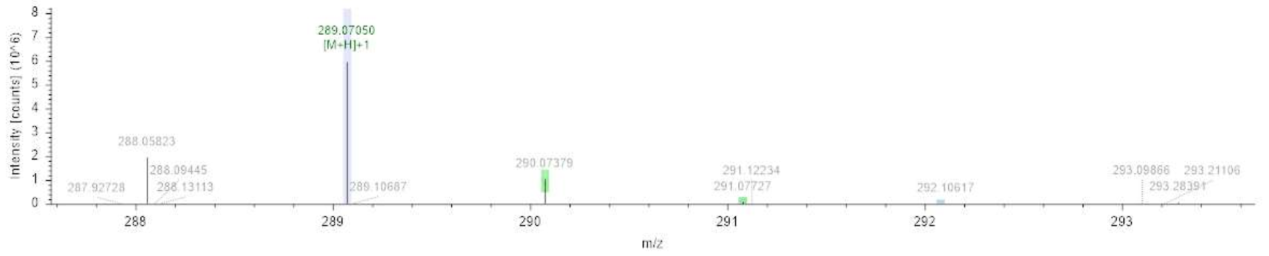


**22. Eriodictyol**


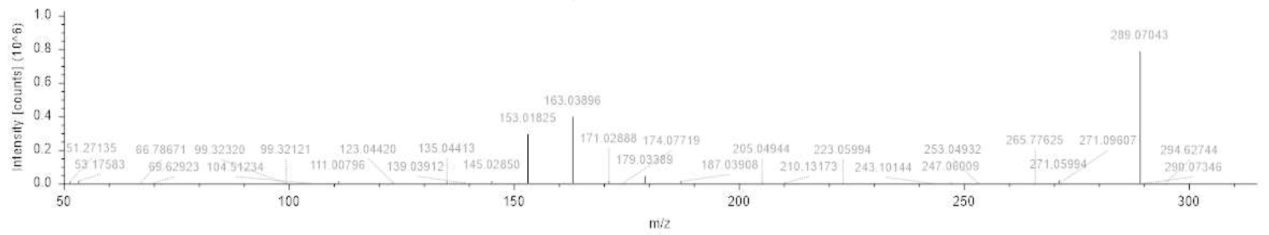


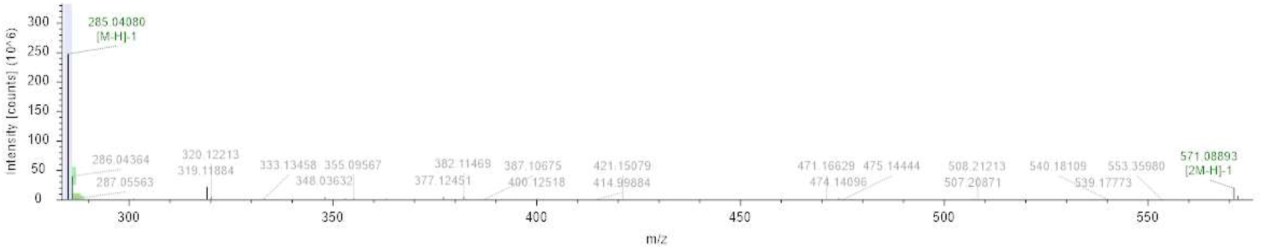


**23. Luteolin**


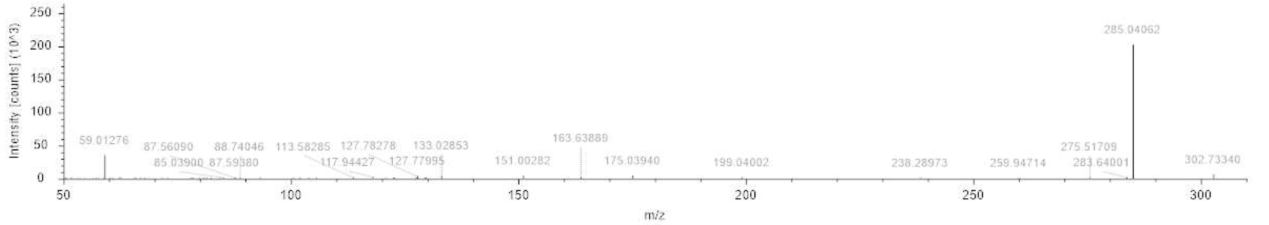


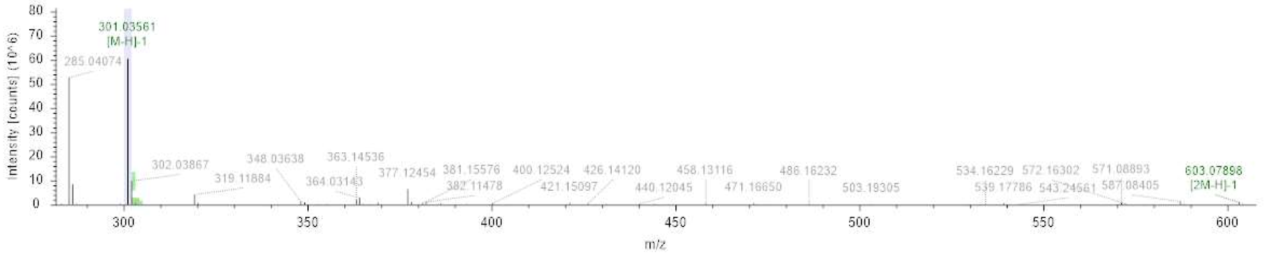


**24. Quercetin**


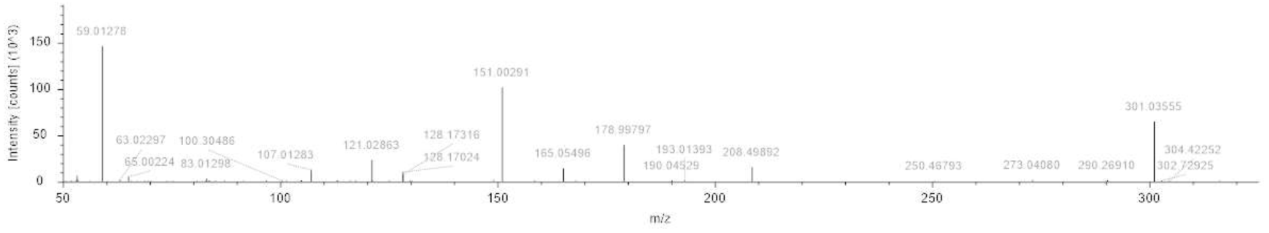


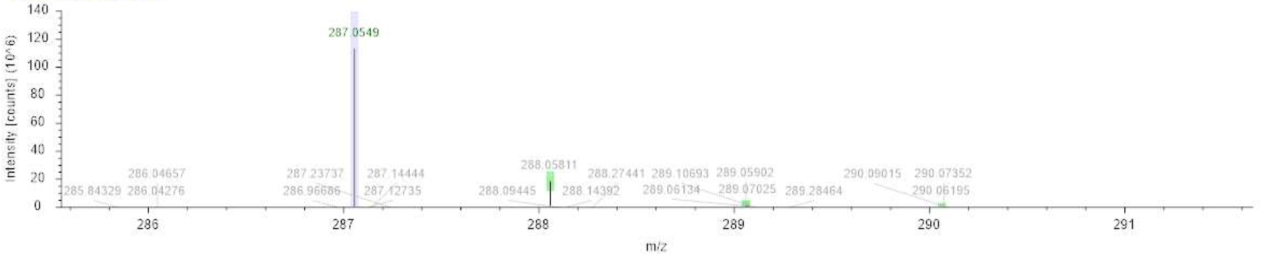


**25. Kaempferol**


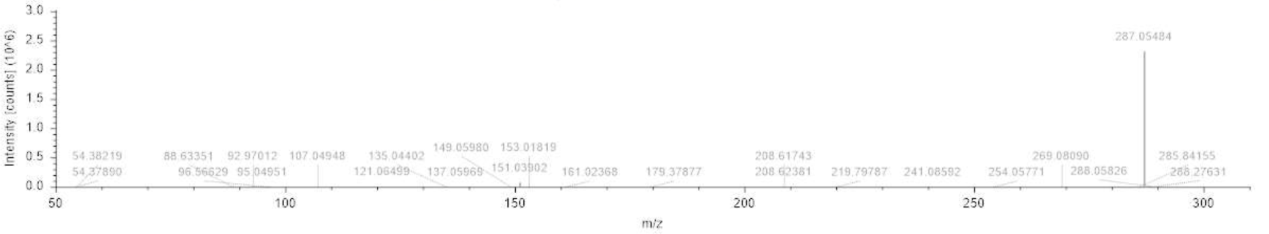


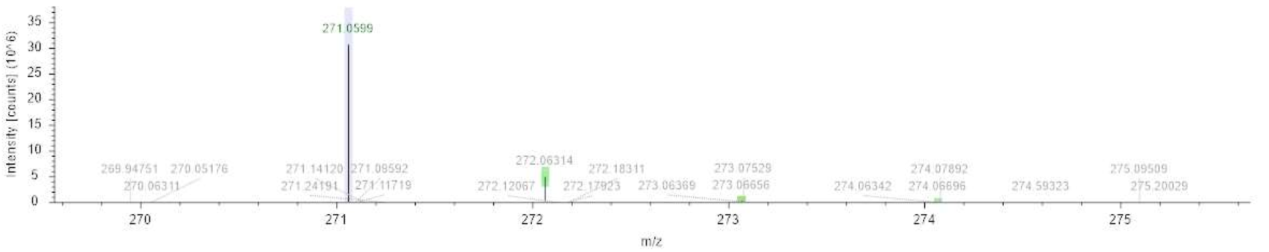


**26. Apigenin**


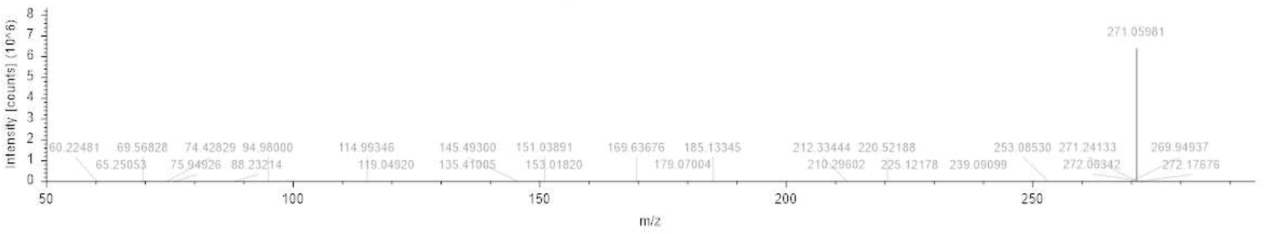


**27. Hispidulin**


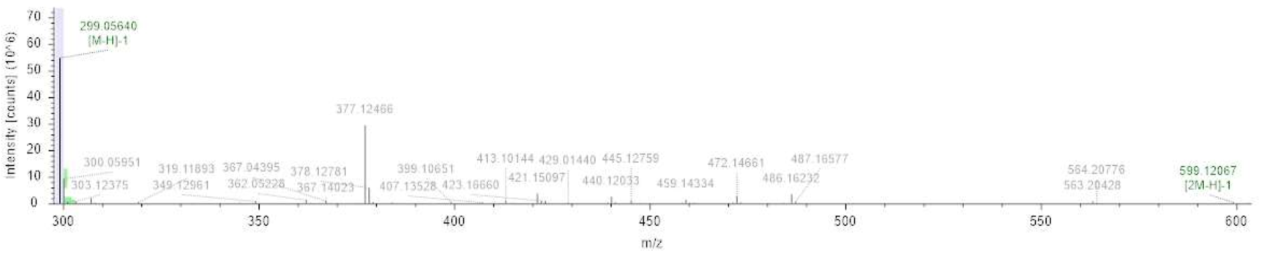


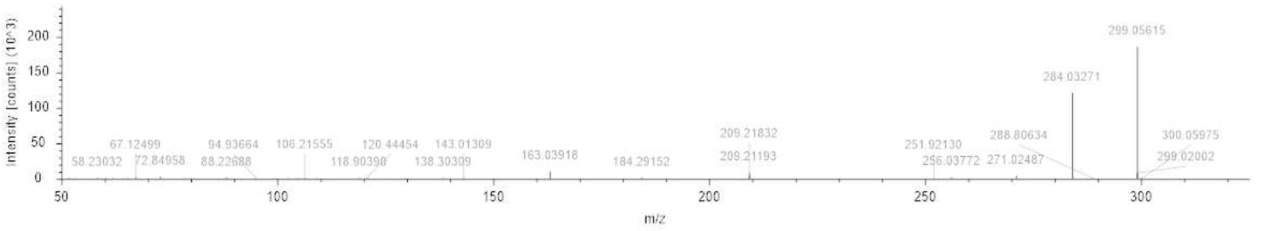


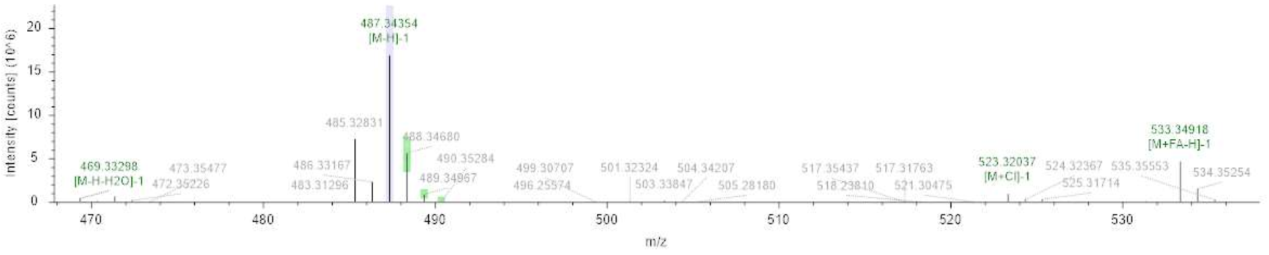


**28. Asiatic acid**


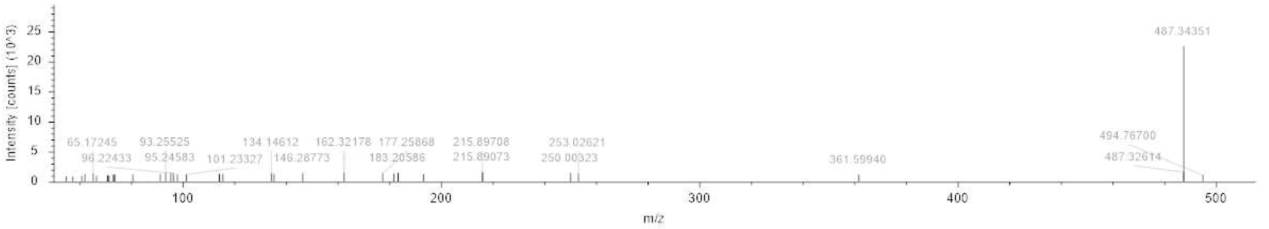


**29. Oleanonic acid**


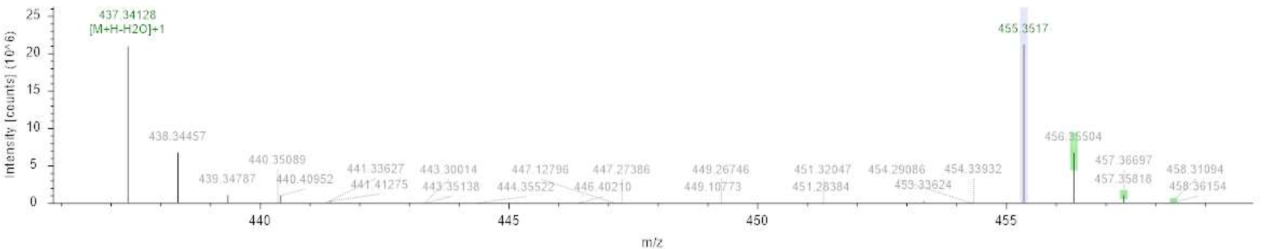


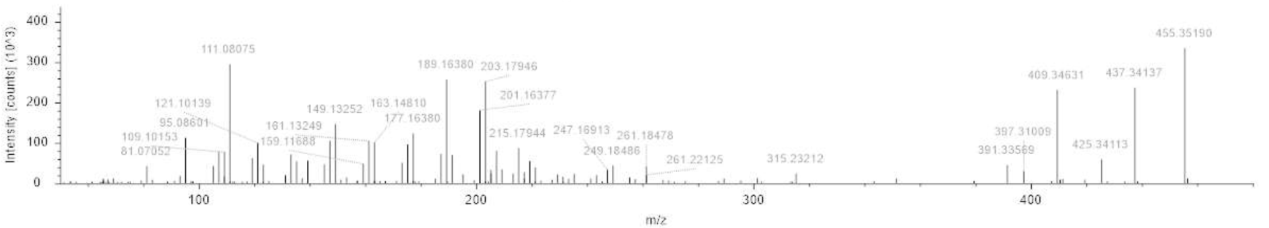


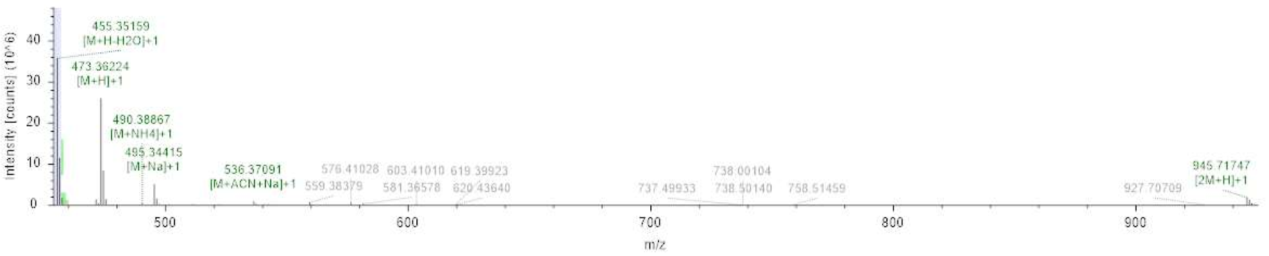


**30. Maslinic acid**


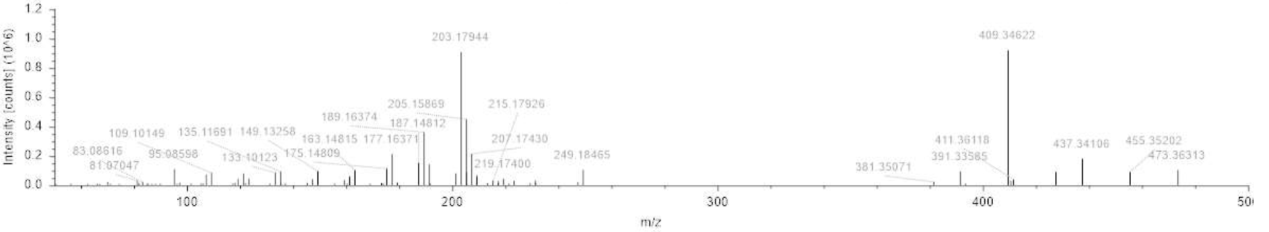


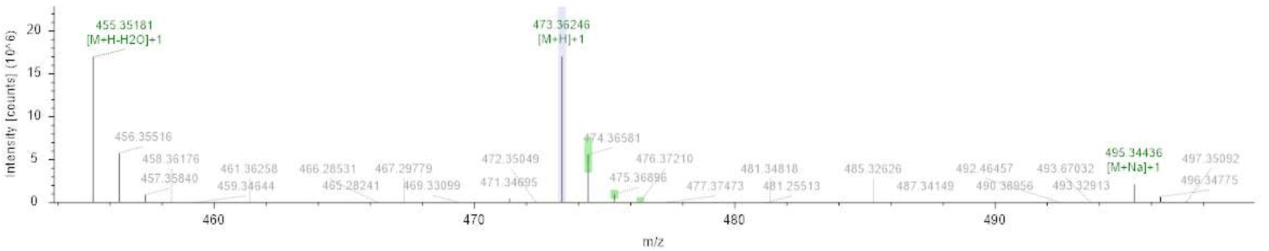


**31. Corosolic acid**


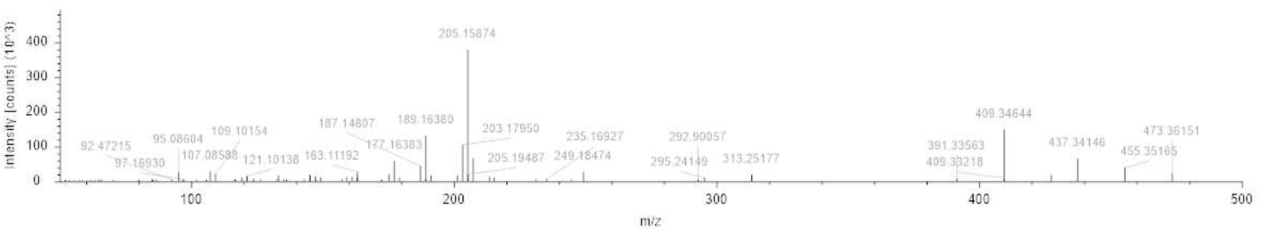


**32. Ursolic acid**


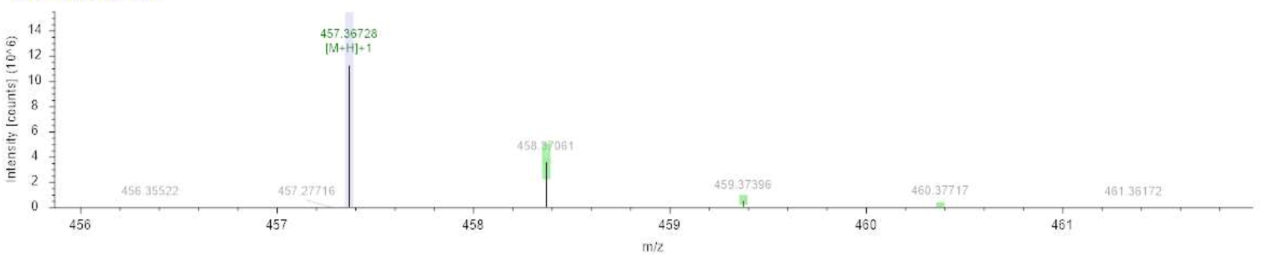


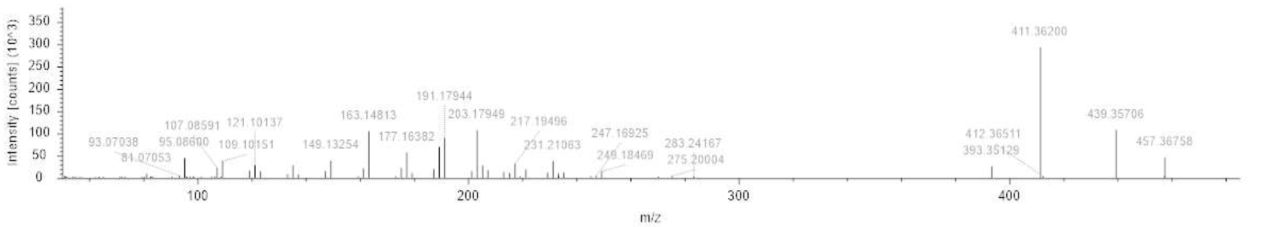


**33. Oleanolic acid**


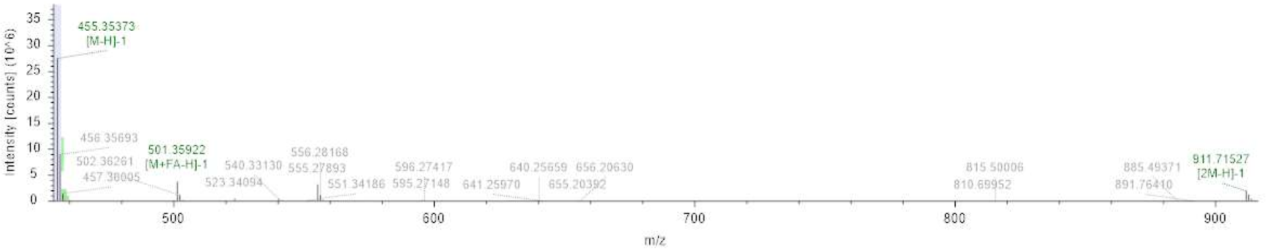


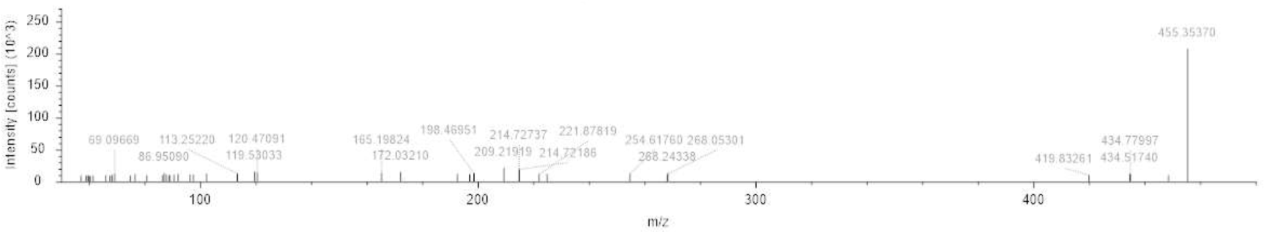


Figure S1. MS and MS/MS data of the 33 phytochemicals identified in the olive leaves by UPLC-Q-Exactive Orbitrap-MS.
